# Supplementary material for: Prussian blue analogues: a new class of anode materials for lithium ion batteries
Source: Royal Society of Chemistry journal article supplement (doi:10.1039/c4ta00062e), 2014-01-01
Supplement: c4ta00062e1.pdf [file c4ta00062e1.pdf]

Electronic Supplementary Information (ESI) for Journal of Materials Chemistry A  
This journal is © The Royal Society of Chemistry 2014

## **Electronic Supplementary Information (ESI)**

### **Prussian blue analogues: a new class of anode materials for lithium ion batteries**

**Ping Nie, Laifa Shen, Haifeng Luo, Bing Ding, Guiyin Xu, Jie Wang, and Xiaogang Zhang\***

College of Material Science and Engineering, Nanjing University of Aeronautics and Astronautics, Nanjing, 210016, P. R. China

\*Corresponding author, azhangxg@163.com; Tel: +86-25-52112918; Fax: +86-25-52112626.

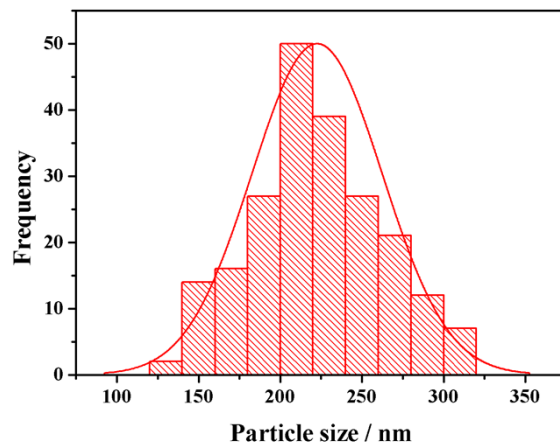

**Fig. S1** Size distribution histograms of as-synthesized  $\text{Co}_3[\text{Co}(\text{CN})_6]_2$  nanocubes.

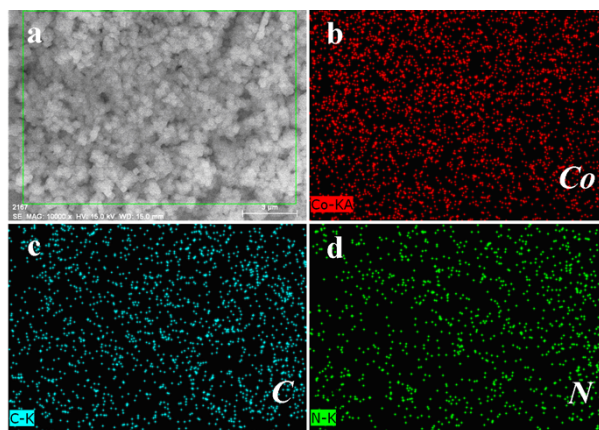

**Fig. S2** Elemental mapping images of (b) cobalt, (c) carbon, and (d) nitrogen in  $\text{Co}_3[\text{Co}(\text{CN})_6]_2 \cdot n\text{H}_2\text{O}$  nanocubes.

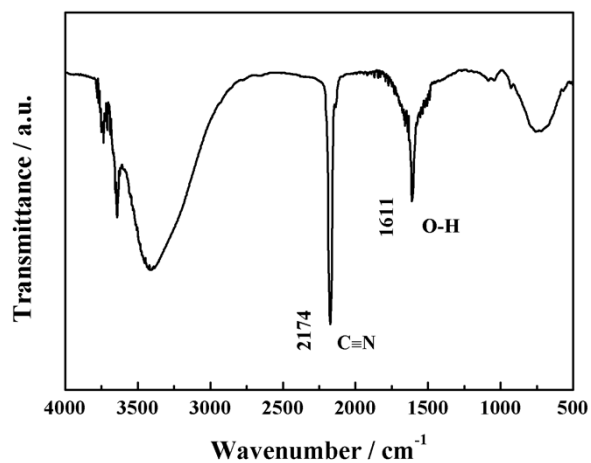

**Fig. S3** FTIR spectrum of the  $\text{Co}_3[\text{Co}(\text{CN})_6]_2$  sample.

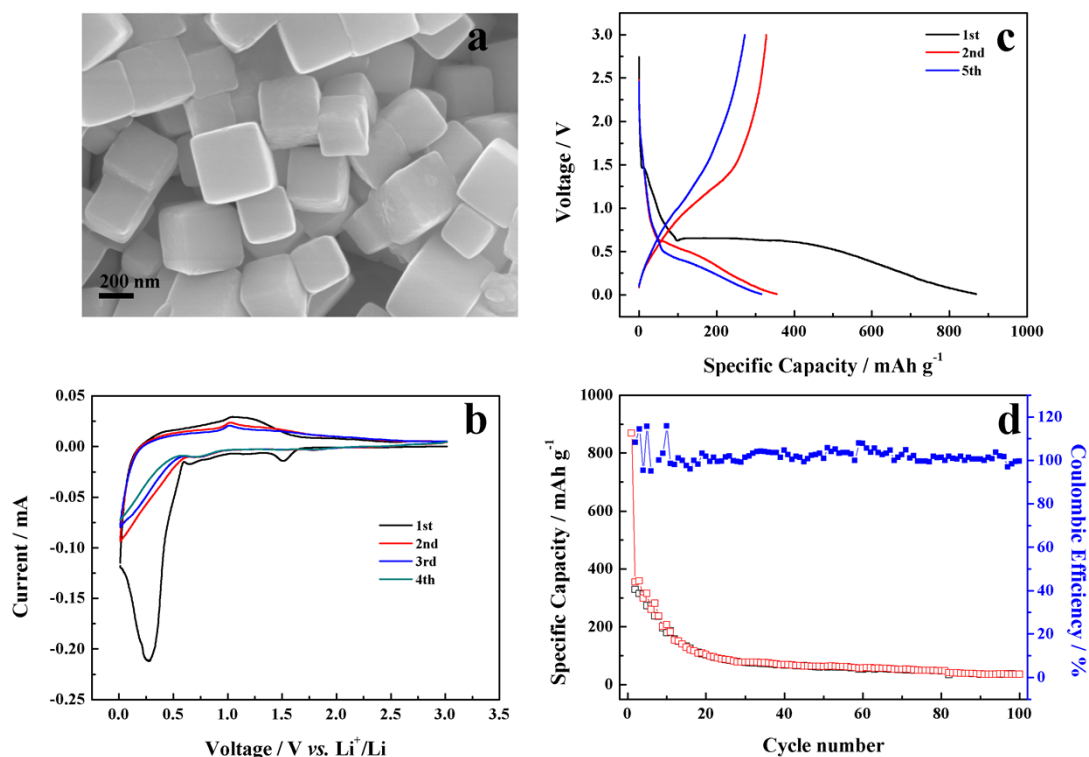

**Fig. S4** (a) SEM image, (b) CV curves of the first four cycles between 0.01-3 V at a scanning rate of  $0.1 \text{ mV s}^{-1}$ , (c) Galvanostatic charge/discharge profiles of the 1st, 2nd, and 5th cycles, and (d) Cycling performance and Coulombic efficiency of  $\text{Mn}_3[\text{Co}(\text{CN})_6]_2 \cdot n\text{H}_2\text{O}$  electrode under a current density of  $50 \text{ mA g}^{-1}$ .

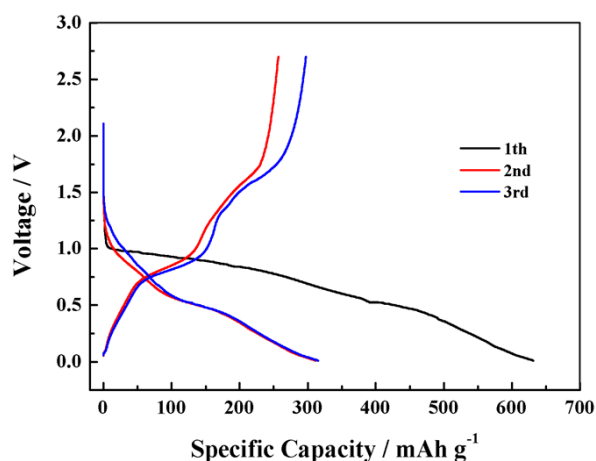

**Fig. S5** The 1<sup>st</sup>, 2<sup>nd</sup> and 3<sup>rd</sup> discharge and charge profiles of  $\text{Co}_3[\text{Co}(\text{CN})_6]_2 \cdot n\text{H}_2\text{O}$  nanocubes between 0.01 and 2.7 V vs.  $\text{Na}/\text{Na}^+$  at a current density  $20 \text{ mA g}^{-1}$ .

Currently, there exists growing scientific and commercial interest in room-temperature sodium-ion batteries (NIBs) technology owing to abundant supply and

low cost of sodium resources.<sup>1</sup> Herein, we have also investigated the use of  $\text{Co}_3[\text{Co}(\text{CN})_6]_2 \cdot n\text{H}_2\text{O}$  as anode material for NIBs. Coin cells for sodium-ion batteries were fabricated using the same procedure for Li batteries. The electrolyte was 1 M  $\text{NaClO}_4$  dissolved in a mixture of ethylene carbonate (EC) and propylene carbonate (PC) with a volume ratio of 1:1. Na metal was used as the reference and counter electrode, and a glass microfiber filter as the separator. Fig. S5 show the discharge/charge profiles of  $\text{Co}_3[\text{Co}(\text{CN})_6]_2 \cdot n\text{H}_2\text{O}$  electrode between 0.01 and 2.7 V vs.  $\text{Na}/\text{Na}^+$  at current density of 20 mAh g<sup>-1</sup>. As shown in Fig. S5, the galvanostatic charge-discharge profiles are similar to that in Li-ion batteries except the lower charge/discharge potentials. The initial discharge and charge capacities are about 631.3 and 256.7 mAh g<sup>-1</sup>, respectively. The reversible capacity in the second cycle is almost stable and maintained at about 311.6 mAh g<sup>-1</sup>. The results demonstrate that the material can be used as a promising anode candidate for NIBs.

1. H. Pan, Y.-S. Hu and L. Chen, *Energy Environ. Sci.*, 2013, **6**, 2338-2360.
